# Supplementary material
Source: ML conference proceedings conference paper supplement (https://openaccess.thecvf.com/content/CVPR_2020/html/Chen_Norm-Aware_Embedding_for_CVPR_2020_paper.html)
Supplement: Supplementary file 2 [file Chen_Norm-Aware_Embedding_for_CVPR_2020_supplemental.zip]

Archive with 1 entries (1 files):
- CVPR2020_DiChen_supp.pdf
